# Supplementary material for: Biomass-Derived Porous Carbon from Agar as an Anode Material for Lithium-Ion Batteries
Source: MDPI journal article supplement (doi:10.3390/nano12010022), 2021-12-22
Supplement: s1 [file s1]

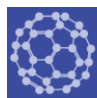

Supplementary materials

# Biomass-Derived Porous Carbon from Agar as an Anode Material for Lithium-ion Batteries

Nurbolat Issatayev <sup>1,2</sup> Gulnur Kalimuldina <sup>3,\*</sup>, Arailym Nurpeissova<sup>1</sup>, and Zhumabay Bakenov <sup>1,2,\*</sup>

<sup>1</sup> National Laboratory Astana, Nazarbayev University, Kabanbay Batyr Ave. 53, Nur-Sultan 010000, Kazakhstan; nurbolat.issatayev@nu.edu.kz (N.I.); arailym.nurpeissova@nu.edu.kz (A.N.); zbakenov@nu.edu.kz (Z.B.)

<sup>2</sup> Department of Chemical and Materials Engineering, School of Engineering and Digital Sciences, Nazarbayev University, Kabanbay Batyr Ave. 53, Nur-Sultan 010000, Kazakhstan;

<sup>3</sup> Department of Mechanical and Aerospace Engineering, School of Engineering and Digital Sciences, Nazarbayev University, Kabanbay Batyr Ave. 53, Nur-Sultan 010000, Kazakhstan; gkalimuldina@nu.edu.kz

\* Correspondence: authors: gkalimuldina@nu.edu.kz ; Tel.: +7-717-269-4578, zbakenov@nu.edu.kz; Tel: +7-717-270-65-30

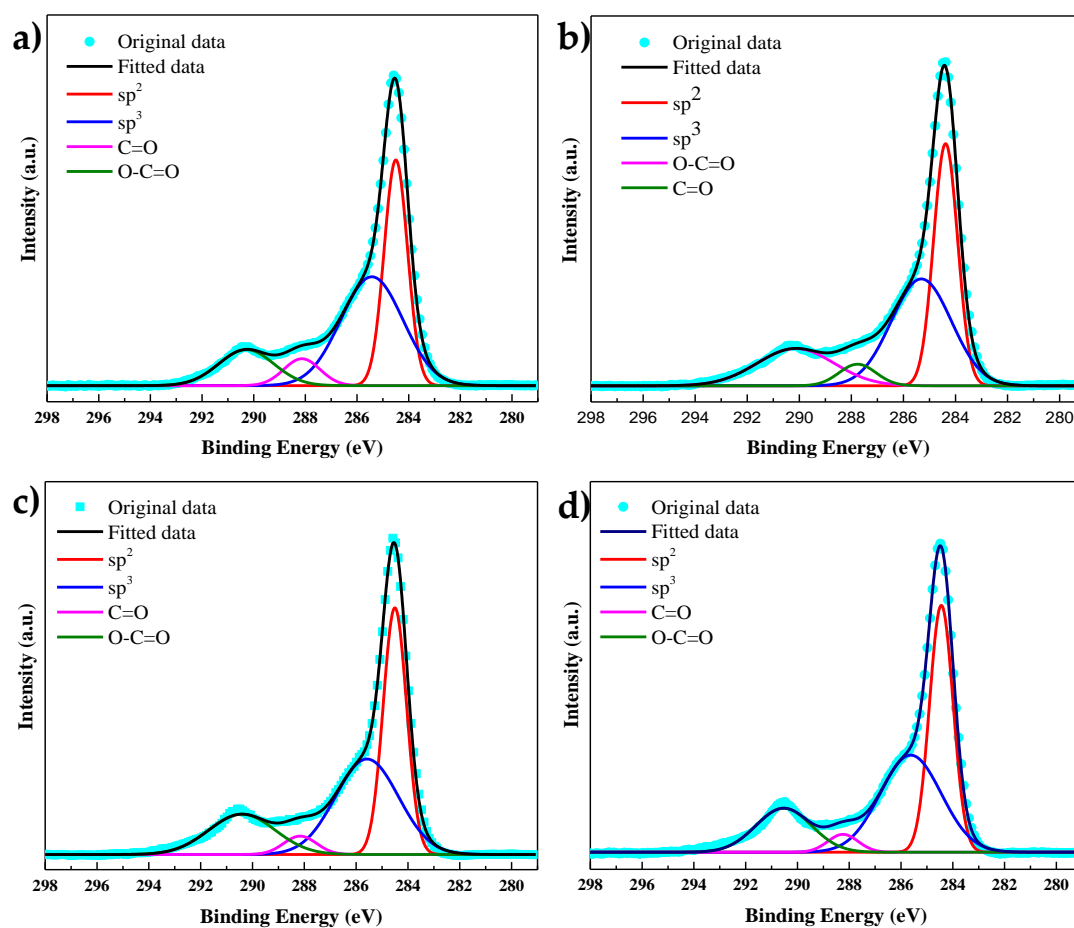

Figure S1. XPS spectra of a) KAAC; b) ZAAC; c) PAAC; d) SAAC.

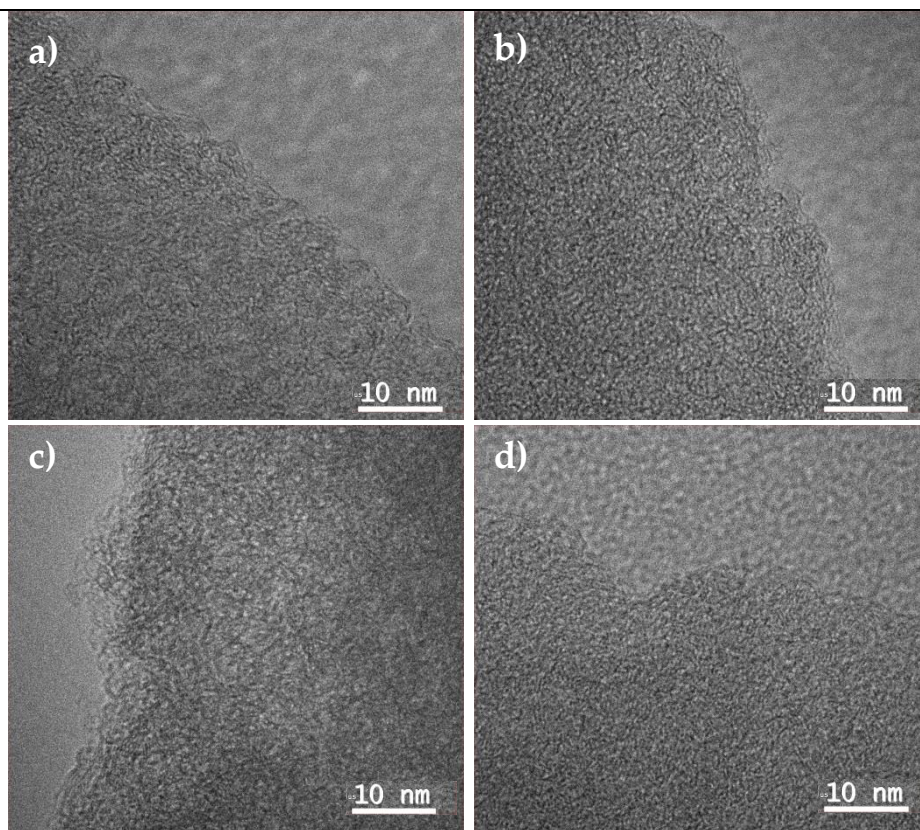

**Figure S2.** TEM images of ACs with four different activating agents: **a)** SAAC; **b)** PAAC; **c)** KAAC; **d)** ZAAC.



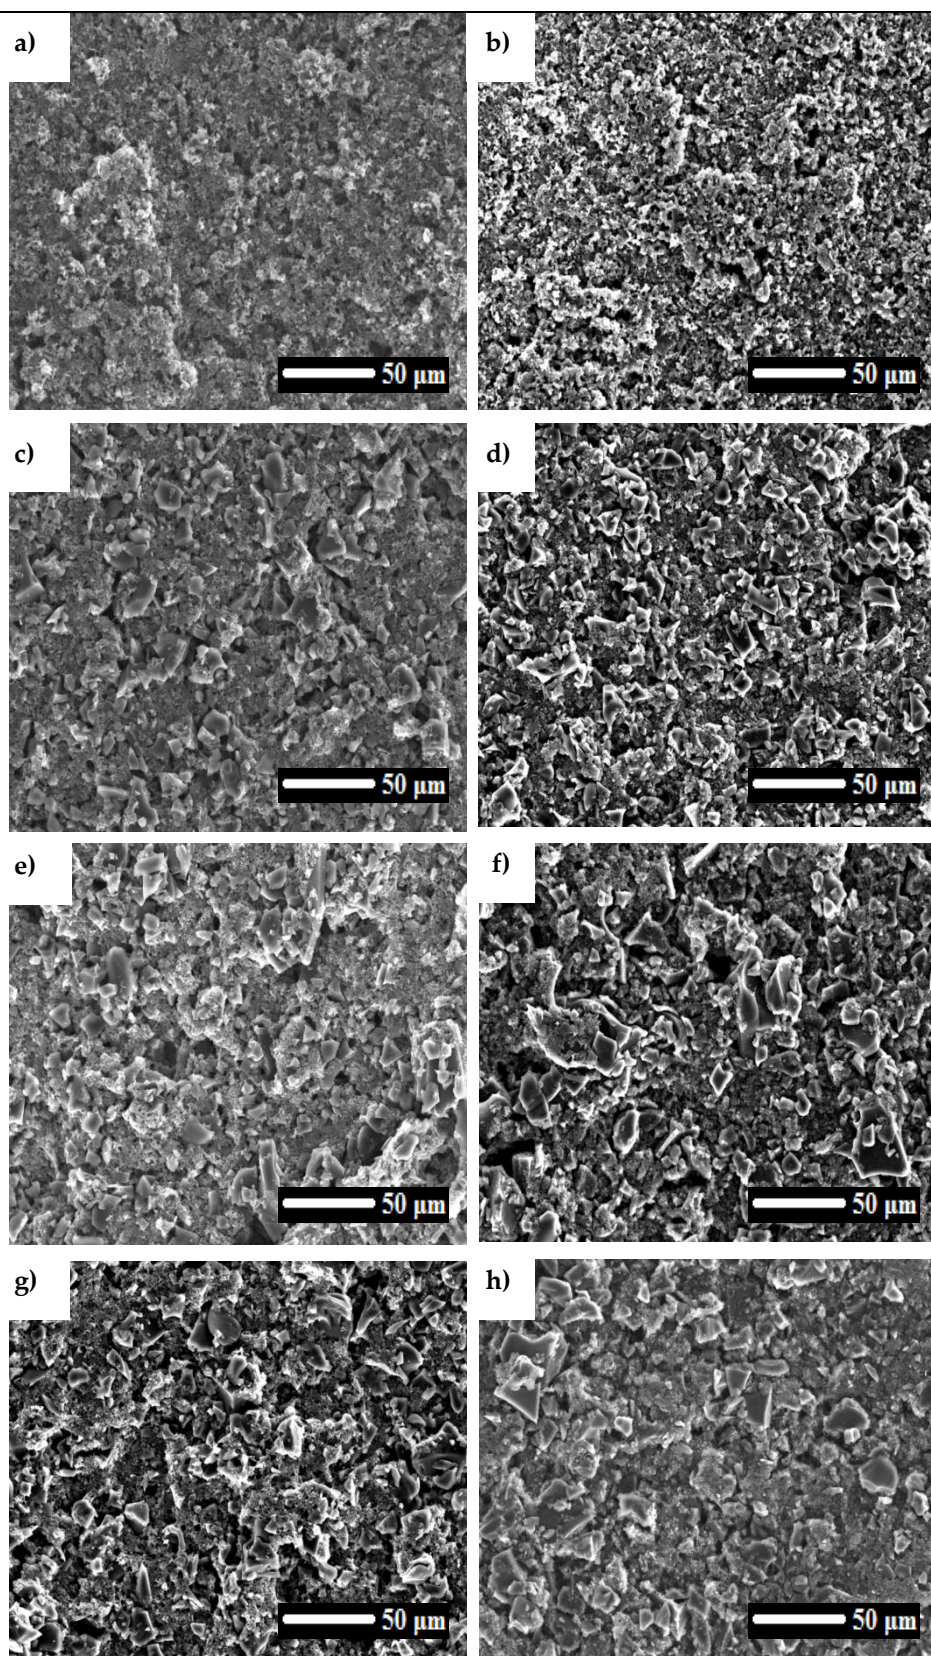

**Figure S3.** SEM images of pristine electrodes: a) KAAC, c) PAAC, e) ZAAC, and g) SAAC, and electrodes after 20 cycles: b) KAAC, d) PAAC, f) ZAAC, and h) SAAC.

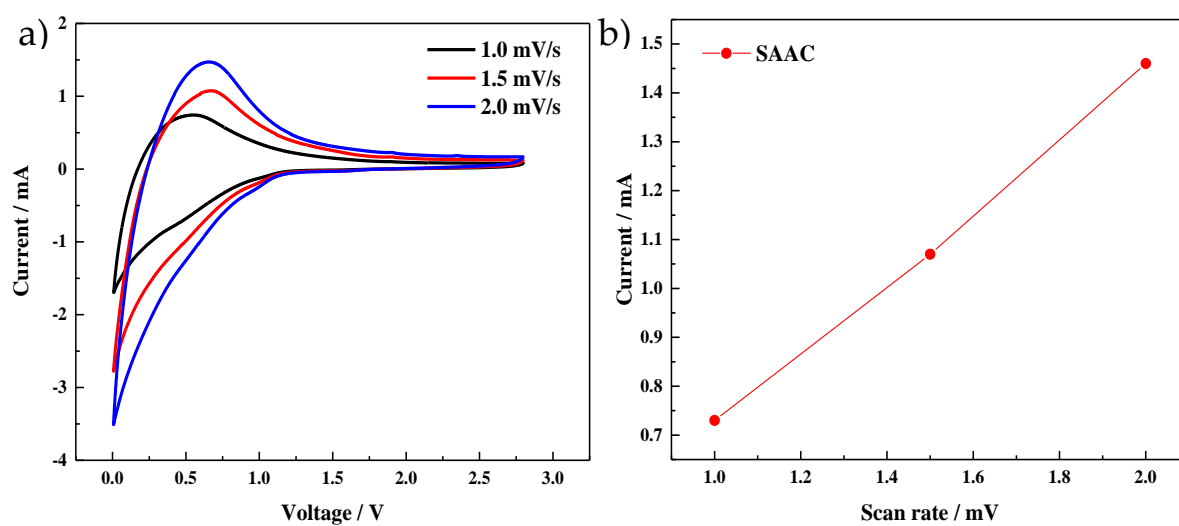

**Figure S4.** a) CV curves of SAAC electrodes at various scan rates of 1.0 mV s<sup>-1</sup>, 1.5 mV s<sup>-1</sup>, and 2.0 mV s<sup>-1</sup>; b) Relationship between the redox peak current and scanning rates.
